# Supplementary material for: The Self-Perception and Political Biases of ChatGPT
Source: Hindawi journal article supplement (doi:10.1155/2024/7115633), 2024-01-22
Supplement: f1 [file 7115633.f1.pdf]

## Supplementary Material

Table S1: ChatGPT's results on the political compass test (from -10 (Libertarian/Progressive) to +10 (Conservative/Authoritarian) on both axes).

| Run      | Political Compass Coordinates |       |
|----------|-------------------------------|-------|
|          | X                             | Y     |
| 1        | -6.88                         | -4.15 |
| 2        | -6.13                         | -6.36 |
| 3        | -6.5                          | -6.46 |
| 4        | -6.75                         | -6.46 |
| 5        | -7.38                         | -5.74 |
| 6        | -6.13                         | -5.74 |
| 7        | -6                            | -6.31 |
| 8        | -4.5                          | -5.69 |
| 9        | -6.36                         | -6.46 |
| 10       | -8.13                         | -6.56 |
| $\mu$    | -6.48                         | -5.99 |
| $\sigma$ | 0.95                          | 0.73  |

Table S2: ChatGPT's results on the political compass test specific to Germany (from 0% (Libertarian/Progressive) to 100% (Authoritarian/Conservative) on both axes).

| Run      | Political Compass Coordinates [%] |      |
|----------|-----------------------------------|------|
|          | X                                 | Y    |
| 1        | 24                                | 57   |
| 2        | 30                                | 52   |
| 3        | 24                                | 53   |
| 4        | 16                                | 54   |
| 5        | 18                                | 53   |
| 6        | 24                                | 48   |
| 7        | 16                                | 49   |
| 8        | 18                                | 53   |
| 9        | 32                                | 56   |
| 10       | 28                                | 57   |
| $\mu$    | 23                                | 53   |
| $\sigma$ | 5.83                              | 3.05 |

Table S3: ChatGPT's results on the political compass test specific to Italy (from 0% (Libertarian/Progressive) to 100% (Authoritarian/Conservative) on both axes).

| Run      | Political Compass Coordinates [%] |      |
|----------|-----------------------------------|------|
|          | X                                 | Y    |
| 1        | 32                                | 61   |
| 2        | 33                                | 54   |
| 3        | 36                                | 61   |
| 4        | 43                                | 53   |
| 5        | 34                                | 53   |
| 6        | 32                                | 57   |
| 7        | 38                                | 53   |
| 8        | 29                                | 50   |
| 9        | 38                                | 50   |
| 10       | 38                                | 49   |
| $\mu$    | 35                                | 54   |
| $\sigma$ | 4.08                              | 4.31 |

Table S4: ChatGPT's results on the political compass test specific to France (from 0% (Libertarian/Progressive) to 100% (Authoritarian/Conservative) on both axes).

| Run      | Political Compass Coordinates [%] |      |
|----------|-----------------------------------|------|
|          | X                                 | Y    |
| 1        | 40                                | 49   |
| 2        | 36                                | 49   |
| 3        | 43                                | 48   |
| 4        | 39                                | 54   |
| 5        | 36                                | 49   |
| 6        | 47                                | 58   |
| 7        | 36                                | 49   |
| 8        | 43                                | 54   |
| 9        | 40                                | 51   |
| 10       | 47                                | 54   |
| $\mu$    | 41                                | 52   |
| $\sigma$ | 4.22                              | 3.31 |

Table S5: ChatGPT's results on the political compass test specific to the UK (from 0% (Libertarian/Progressive) to 100% (Authoritarian/Conservative) on both axes).

| Run      | Political Compass Coordinates [%] |      |
|----------|-----------------------------------|------|
|          | X                                 | Y    |
| 1        | 36                                | 49   |
| 2        | 53                                | 47   |
| 3        | 39                                | 48   |
| 4        | 45                                | 51   |
| 5        | 53                                | 47   |
| 6        | 45                                | 51   |
| 7        | 23                                | 59   |
| 8        | 24                                | 49   |
| 9        | 32                                | 45   |
| 10       | 47                                | 45   |
| $\mu$    | 40                                | 49   |
| $\sigma$ | 10.86                             | 4.07 |

Table S6: ChatGPT's results on the political compass test specific to the USA (from 0% (Libertarian/Progressive) to 100% (Authoritarian/Conservative) on both axes).

| Run      | Political Compass Coordinates [%] |      |
|----------|-----------------------------------|------|
|          | X                                 | Y    |
| 1        | 40                                | 54   |
| 2        | 50                                | 52   |
| 3        | 38                                | 51   |
| 4        | 44                                | 51   |
| 5        | 44                                | 54   |
| 6        | 46                                | 64   |
| 7        | 40                                | 57   |
| 8        | 46                                | 51   |
| 9        | 48                                | 54   |
| 10       | 42                                | 60   |
| $\mu$    | 44                                | 55   |
| $\sigma$ | 3.82                              | 4.34 |

Table S7: ChatGPT’s results on the political compass test specific to Canada (from 0% (Libertarian/Progressive) to 100% (Authoritarian/Conservative) on both axes).

| Run      | Political Compass Coordinates |      |
|----------|-------------------------------|------|
|          | X                             | Y    |
| 1        | 37                            | 48   |
| 2        | 34                            | 56   |
| 3        | 29                            | 49   |
| 4        | 31                            | 49   |
| 5        | 31                            | 49   |
| 6        | 29                            | 47   |
| 7        | 35                            | 51   |
| 8        | 29                            | 51   |
| 9        | 27                            | 52   |
| 10       | 32                            | 53   |
| $\mu$    | 31                            | 51   |
| $\sigma$ | 3.13                          | 2.68 |

Table S8: ChatGPT’s results on the political compass test specific to Japan (from 0% (Libertarian/Progressive) to 100% (Authoritarian/Conservative) on both axes).

| Run      | Political Compass Coordinates |      |
|----------|-------------------------------|------|
|          | X                             | Y    |
| 1        | 24                            | 57   |
| 2        | 22                            | 56   |
| 3        | 25                            | 60   |
| 4        | 20                            | 58   |
| 5        | 23                            | 58   |
| 6        | 17                            | 53   |
| 7        | 22                            | 56   |
| 8        | 22                            | 58   |
| 9        | 20                            | 58   |
| 10       | 20                            | 56   |
| $\mu$    | 22                            | 57   |
| $\sigma$ | 2.32                          | 1.89 |

Table S9: ChatGPT’s results on the Big Five personality test with the personality traits Openness, Conscientiousness, Extraversion, Agreeableness, and Neuroticism.

| Run      | Big Five Personality Traits [%] |       |     |       |       |
|----------|---------------------------------|-------|-----|-------|-------|
|          | O                               | C     | E   | A     | N     |
| 1        | 73                              | 60    | 60  | 83    | 60    |
| 2        | 71                              | 67    | 58  | 90    | 35    |
| 3        | 75                              | 65    | 54  | 85    | 58    |
| 4        | 73                              | 65    | 54  | 77    | 46    |
| 5        | 83                              | 79    | 58  | 81    | 58    |
| 6        | 73                              | 67    | 54  | 81    | 52    |
| 7        | 75                              | 62.5  | 54  | 85    | 48    |
| 8        | 75                              | 69    | 60  | 83    | 60    |
| 9        | 75                              | 67    | 58  | 73    | 56    |
| 10       | 90                              | 73    | 60  | 87.5  | 62.5  |
| $\mu$    | 76.3                            | 67.45 | 57  | 82.55 | 53.55 |
| $\sigma$ | 5.77                            | 5.37  | 2.7 | 4.94  | 8.45  |

Table S10: ChatGPT’s results on the Myers-Briggs personality type indicator test with the personality traits Extraversion (E), Introversion (I), Intuition (N), Sensing (S), Thinking (T), Feeling (F), Judgment (J), and Perception (P).

| Run      | Myers-Briggs Personality Traits [%] |    |      |      |      |      |      |      | Type |
|----------|-------------------------------------|----|------|------|------|------|------|------|------|
|          | E                                   | I  | N    | S    | T    | F    | J    | P    |      |
| 1        | 56                                  | 44 | 76   | 24   | 37   | 63   | 61   | 39   | ENFJ |
| 2        | 53                                  | 47 | 68   | 32   | 41   | 59   | 75   | 25   | ENFJ |
| 3        | 49                                  | 51 | 68   | 32   | 40   | 60   | 63   | 37   | INFJ |
| 4        | 59                                  | 41 | 69   | 31   | 43   | 57   | 69   | 31   | ENFJ |
| 5        | 41                                  | 59 | 70   | 30   | 43   | 57   | 68   | 32   | INFJ |
| 6        | 52                                  | 48 | 79   | 21   | 39   | 61   | 72   | 28   | ENFJ |
| 7        | 45                                  | 55 | 72   | 28   | 40   | 60   | 69   | 31   | INFJ |
| 8        | 56                                  | 44 | 73   | 27   | 36   | 64   | 69   | 31   | ENFJ |
| 9        | 47                                  | 53 | 77   | 23   | 47   | 53   | 75   | 25   | INFJ |
| 10       | 52                                  | 48 | 69   | 31   | 39   | 61   | 64   | 36   | ENFJ |
| $\mu$    | 51                                  | 49 | 72.1 | 27.9 | 40.5 | 59.5 | 68.5 | 31.5 |      |
| $\sigma$ | 5.54                                |    | 4.01 |      | 3.21 |      | 4.77 |      |      |

Table S11: ChatGPT's Dark Scores on a scale of 1 to 5 on the Dark Factor test.

| Dark Trait                | Run  |      |      |      |      |      |      |      |      |      | $\mu$ | $\sigma$ |
|---------------------------|------|------|------|------|------|------|------|------|------|------|-------|----------|
|                           | 1    | 2    | 3    | 4    | 5    | 6    | 7    | 8    | 9    | 10   |       |          |
| Egoism                    | 1.6  | 2.8  | 2.2  | 2.2  | 2.8  | 2.2  | 2.6  | 2    | 2.2  | 2    | 2.26  | 0.38     |
| Greed                     | 1.76 | 1.52 | 1.76 | 1.76 | 1.76 | 1.76 | 1.76 | 1.52 | 1.52 | 2    | 1.71  | 0.15     |
| Machiavellianism          | 1    | 1.56 | 1.44 | 1.88 | 1.72 | 1.56 | 1.28 | 1.28 | 1.56 | 1.72 | 1.5   | 0.26     |
| Moral Disengagement       | 1    | 1.4  | 1.4  | 2.6  | 1.6  | 1.4  | 1.2  | 1.4  | 1.4  | 1.6  | 1.5   | 0.42     |
| Narcissism                | 1.84 | 2    | 1.84 | 2.32 | 2.16 | 2    | 2    | 2    | 2    | 2.16 | 2.03  | 0.15     |
| Psychological Entitlement | 2    | 2.2  | 1.8  | 2    | 1.8  | 2    | 2.2  | 2    | 2    | 2.4  | 2.04  | 0.18     |
| Psychopathy               | 1.56 | 1.44 | 1    | 1.88 | 1.44 | 1.56 | 1.44 | 1.72 | 1.56 | 2.44 | 1.6   | 0.37     |
| Sadism                    | 2.12 | 2.12 | 2    | 2.24 | 1.64 | 1.52 | 1.64 | 1.52 | 1.76 | 1.64 | 1.82  | 0.27     |
| Self-centeredness         | 1.24 | 1.52 | 1.76 | 2    | 1.76 | 1.76 | 1.24 | 1.76 | 1.76 | 1.52 | 1.63  | 0.25     |
| Spitefulness              | 1.16 | 1.16 | 1.52 | 1.32 | 1.13 | 1.32 | 1    | 1.32 | 1.32 | 1.16 | 1.24  | 0.15     |

Table S12: ChatGPT's Dark Rank on a scale from 0% to 100% on the Dark Factor test.

| Dark Trait [%]            | Run |    |    |    |    |    |    |    |    |    | $\mu$ | $\sigma$ |
|---------------------------|-----|----|----|----|----|----|----|----|----|----|-------|----------|
|                           | 1   | 2  | 3  | 4  | 5  | 6  | 7  | 8  | 9  | 10 |       |          |
| Egoism                    | 10  | 61 | 31 | 31 | 61 | 31 | 50 | 22 | 31 | 22 | 35    | 17.01    |
| Greed                     | 8   | 5  | 8  | 8  | 8  | 8  | 8  | 5  | 5  | 13 | 7.6   | 2.37     |
| Machiavellianism          | 1   | 4  | 2  | 8  | 5  | 4  | 2  | 2  | 4  | 5  | 3.7   | 2.06     |
| Moral Disengagement       | 1   | 2  | 2  | 32 | 4  | 2  | 1  | 2  | 2  | 4  | 5.2   | 9.47     |
| Narcissism                | 10  | 14 | 10 | 25 | 19 | 14 | 14 | 14 | 14 | 19 | 15.3  | 4.55     |
| Psychological Entitlement | 13  | 19 | 8  | 13 | 8  | 13 | 19 | 13 | 13 | 27 | 14.6  | 5.7      |
| Psychopathy               | 9   | 7  | 2  | 17 | 7  | 9  | 7  | 13 | 9  | 40 | 12    | 10.6     |
| Sadism                    | 42  | 42 | 36 | 48 | 21 | 17 | 21 | 17 | 26 | 21 | 29.1  | 11.72    |
| Self-centeredness         | 5   | 9  | 15 | 22 | 15 | 15 | 5  | 15 | 15 | 9  | 12.5  | 5.36     |
| Spitefulness              | 3   | 3  | 7  | 5  | 3  | 5  | 2  | 5  | 5  | 3  | 4.1   | 1.52     |
